## 1 Quadrangular Space Syndrome: A Systematic Review of Surgical and Medical Therapeutic advances

2 Sundip Charmode<sup>1</sup>, Shelja Sharma<sup>2,\*</sup>, Sudhir Kushwaha<sup>3</sup>, Simmi Mehra<sup>4</sup>, Shalom Philip<sup>5</sup>, Ranjna Janagal<sup>6</sup>, Pratik  
3 Amrutiya<sup>7</sup>

4 <sup>1</sup> Affiliation 1,4,5,6; All India Institute of Medical Sciences, Rajkot; Gujarat- 360001; sundip.charmode@yahoo.com

5 <sup>2</sup> Affiliation 2,3; All India Institute of Medical Sciences, Gorakhpur; Uttar Pradesh -273008; docshailja@gmail.com.

6 \* Correspondence: ssdohe@gmail.com; Tel.: 9633239685

7 **Abstract:** The Axillary Nerve (AXN) and Posterior Circumflex Humeral Artery (PCHA) are compressed in quadrangular space  
8 syndrome (QSS), which can be treated with conservative approaches or surgical decompression in recalcitrant instances. There are  
9 no clear guidelines for determining which surgical method is optimal for treating QSS and other disorders that mirror QSS. The  
10 goal of this study is to grade and review past, current, and planned medicinal and surgical care modalities for QSS. PROSPERO  
11 was used to submit the review protocol (ID: 332766). To identify recent advances in the methods/techniques of medical and sur-  
12 gical management of QSS, PubMed and Medline databases were searched until March 2022 for publications, including case stud-  
13 ies, case reports, and review articles, using Medical Subject Headings (MeSH) terms like quadrilateral space syndrome, surgical  
14 management, and medical management. Throughout the study, all the authors scrupulously followed a well-developed registered  
15 review process and the risk of bias in systematic reviews (ROBIS) guidance tool. Data on proposed medical and surgical man-  
16 agement methods/techniques was compiled, and each was analyzed based on the underlying neuro-vascular systems. There were  
17 88 items found in the first search. Following applying the inclusion and exclusion criteria, 16 papers were chosen for synthesis in  
18 the review study after a thorough assessment. Three studies (conservative and advanced) focused on medical care of QSS, while 12  
19 articles (prior, current, and newer) focused on surgical management of QSS. Only four of the 15 studies reviewed proposed dif-  
20 ferent surgical approaches/techniques for surgical decompression in QSS. There were two regularly used surgical procedures  
21 discovered, one anterior/delto-pectoral and the other posterior/scapular. The anterior route is more technically straightforward  
22 and can be employed for surgical QSS decompression.

23 **Keywords:** Quadrangular Space Syndrome; Quadrilateral Space Syndrome; Surgical decompression; Medical management; Ax-  
24 illary nerve; Posterior circumflex humeral artery.

25

26

### 27 1. Introduction

28 Quadrilateral Space Syndrome (QSS) is a rare neuro-vascular entrapment disease in which the Axillary nerve  
29 (AXN) or Posterior Humeral Circumflex Artery (PHCA) are entrapped in the quadrilateral space due to injury,  
30 fibrous bands, or muscle border hypertrophy [1].

31 The disease typically affects young adults aged 20 to 35, particularly athletes who participate in overhead  
32 sports such as volleyball [2], baseball [3], swimming [4], and other activities that require regular abduction and  
33 external rotation, such as yoga [5] or window washing [6]. The subscapularis muscle and shoulder capsule  
34 border the intermuscular space on the superior side, and the teres major muscle on the inferior side. The long  
35 head of the triceps and the surgical neck of the humerus limit it medially and laterally [7]. Loose connective  
36 tissue, fat, veins, the AXN, and the PHCA are all included [7]. Patients are usually advised to start with  
37 conservative therapies like physical therapy and activity modification [2]. When patients do not respond to  
38 conservative therapy for at least six months, surgical decompression is considered [8]. The management entails  
39 decompression, which entails a variety of techniques that have yet to be validated, particularly among the  
40 Indian population. The goal of our research is to grade the various medicinal and surgical treatments for  
41 Quadrangular Space Syndrome.

### Functional Anatomy of Axillary Nerve (AXN):

The AXN is located behind the brachial artery and lateral to the radial nerve, in front of the subscapularis. The AXN joins the posterior circumflex humeral artery in the quadrangular space, positioned between the lateral and long heads of the triceps muscle on the inferior side of the subscapularis. The anterior branch of AXN innervates the deltoid muscle, while the posterior branch innervates the teres minor and deltoid. The posterior branch also innervates the skin across the inferior two-thirds of the deltoid muscle's posterior surface [9].

### Functional Anatomy of Posterior Humeral Circumflex Artery (PHCA):

It enters the posterior scapular region after passing via the quadrangular space. It separates into anterior and posterior branches within the quadrangular space, looping antecedently around the humeral surgical neck to give blood to the superior, inferior, and side sections of the humeral head, the glenohumeral joint, and the surrounding shoulder muscles [10,11]. The borders of the quadrangular space, as well as the structures that cross through it, are depicted in **Figure 1**.

### Figure 1. Boundaries of Quadrangular space with its contents

(This image has been created and edited by Dr. Shalom Philip, Senior resident, AIIMS Rajkot)

## 2. Materials and Methods

### REVIEW

### METHODS:

To reduce the risk of bias in the study, a systematic review protocol was prepared and submitted with PROSPERO at the Centre for Reviews and Dissemination, University of York (ID: 332766). The review protocol can be accessed from <https://www.crd.york.ac.uk/prospero/>.

### 2.1 Eligibility criteria

The articles which satisfied the inclusion and exclusion criteria were eligible for review. The inclusion criteria were articles written by both Indian and foreign authors until 31st March 2022, articles related to all relevant medical methods and surgical methods of management of QSS, articles experimenting new methods of treatment on animals for human applications were included. Excluded articles included those which were published after 31st March 2022 and the articles focusing on topics other than medical and surgical methods of management of QSS. There was restriction for non - English language of publication. The publications were divided into two groups/Table 2 and 3, which represented articles focusing on medical and surgical management techniques, respectively.

### 2.2 Search Strategy

A scoping review was conducted of articles published till March 2022 on PubMed, and Medline using these MeSH terms: Quadrilateral Space Syndrome; Quadrangular Space Syndrome; Surgical management; Medical management; Neurovascular structures; Throwing Athletes. The citation search was carried out for all the selected articles in study.

## 78 2.3 Study Selection

79 After applying inclusion and exclusion criteria, two authors (SP and SC) independently assessed all of the  
80 titles, abstracts, full text articles, and reviews found during the initial search, and relevant publications were  
81 shortlisted. All the shortlisted full publications were downloaded and independently examined for relevant  
82 data using the data extraction checklist prepared by both authors. The authors and the methods of the in-  
83 vestigations were not hidden from the reviewers. Any differences were settled through conversation or the  
84 involvement of a third reviewer (SM). The special data needed for the review is mentioned on the checklist  
85 (Table 1). We chose and incorporated the articles that contained this information.

86

87 **Table 1. Checklist for Data Extraction from the Selected Articles**

| Sr. no | Data Collected                                                                                              | Data Ignored                                                                                                           |
|--------|-------------------------------------------------------------------------------------------------------------|------------------------------------------------------------------------------------------------------------------------|
| 1      | Details of various older and recent methods (conservative as well as advanced) of medical management of QSS | Variations in the arrangement/course of neurovascular structures (AXN and PHCA) passing through the Quadrangular Space |
| 2      | Different procedures/methods used for surgical management of QSS like surgical decompression, etc.          | Data regarding the variations in the clinical presentation of patients having QSS                                      |
| 3      | Details regarding the various older and newer techniques of surgical decompression used to treat QSS.       | Data regarding various other conditions mimicking the signs and symptoms of QSS                                        |
| 4      | Disadvantages of older methods/techniques used for medical and surgical decompression of QSS                |                                                                                                                        |
| 5      | Advantages of newer methods/techniques used for medical and surgical decompression of QSS                   |                                                                                                                        |

88 QS: Quadrangular space; QSS: Quadrangular space syndrome

89

## 90 2.4 Data Collection process

91 The authors created a data extraction form that they used to collect data from any two papers they choose,  
92 and it was verified after the pilot trial. Two reviewers (SP and SC) worked separately to gather data from  
93 all the studies that were included. Disagreements were addressed through dialogue and the participation  
94 of a third independent reviewer (SM). The following features of the study were gathered: (i) the research  
95 author; (ii) the study design; (iii) the country and year of publication; (iv) the number of participants; (v)  
96 the participants' age group; (vi) the participants' gender; and (vii) the participants' ethnicity. The follow-  
97 ing information was gathered about the methods/techniques used for the medical and surgical manage-  
98 ment of QSS: (i) the previous, existing, and recent methods used for medical and surgical management of  
99 QSS; (ii) the limitations of the older and existing methods/techniques used for medical and surgical

100 management of QSS (iii) the advantages of the various recent and upcoming methods/techniques used for  
101 medical and surgical management of QSS. Checklist (Table 1).

102

### 103 2.5 Risk of Bias Assessment

104 Two reviewers (SP and SC) independently conducted the risk of bias assessment that was included in the  
105 Data Extraction Form. The risk of bias in systematic reviews (ROBIS) tool was used to assess the risk of  
106 bias in our review study [12].

107

## 108 3. Results

### 109 3.1 Literature search

110 There were 88 publications found after the initial search in PubMed database. After filtering for the Eng-  
111 lish language, original content, and human involvement, 66 remained. Duplicate articles (n= 2) were de-  
112 leted, and two reviewers (SP and SC) independently assessed these 66 publications. The same two inde-  
113 pendent reviewers independently examined 8 papers found through citation searches for eligibility  
114 against the pre-specified inclusion criteria. Disagreements were settled by conversation. After applying  
115 the inclusion and exclusion criteria, 16 articles remained. 38 publications were excluded due to irrelevant  
116 text and 12 publications due to unavailability of full text. Based on each author's appraisal and  
117 cross-verification, 15 publications were selected for synthesis. One review article namely Nicholas  
118 Dalagiannis, et al., 2020 [13] was eligible for review based on the inclusion and exclusion criteria but was  
119 eliminated after reviewers screened them for irrelevant data that was outside the scope of the current re-  
120 view. **Figure 2** shows the PRISMA flow chart, which shows the step-by-step literature search and consid-  
121 eration/rejection procedure.

122

123 **Figure 2. PRISMA flow chart of systematic literature search performed for publications focusing on methods of medical and**  
124 **surgical managemnt of Quadrangular Space Syndrome**

125

126

### 127 3.2 Characteristics of Included studies

128 **Table 2**, and **Table 3** summarizes the characteristics of the 15 selected studies. Out of the reviewed 15  
129 publications, 3 focused on the methods (conservative and advanced) of medical management of QSS  
130 (Shown in Table 2). These 3 publications comprised of 2 case reports and 1 case study. Out of the selected  
131 15 publications, 12 articles focused on methods/techniques (previous, recent, and newer) of surgical  
132 management of QSS (Shown in **Table 3**). These 12 publications comprised of 3 case series, 2 cadaveric  
133 study, 2 book chapters, 3 review articles, and 2 case reports.

134 Among the 15 reviewed articles, only 4 articles focused specifically on describing the various surgical  
135 techniques of surgical decompression of QSS along with their advantages and disadvantages. The  
136 step-by-step procedure of each proposed surgical approach is mentioned in the results section.

137 **Table 4** shows the comparison of the anterior and posterior surgical approaches described in these 4 arti-  
138 cles. The parameters used for comparing these two surgical approaches were anatomical ease of identi-  
139 fying involved neuro-vascular structures, technical expertise required to execute the procedure, probab-

140 ities of injury to neuro-vascular structures, probabilities of postoperative fibrosis and other complications,  
141 and time duration required to complete the procedure.

142

### 143 3.3 Risk of Bias Assessment

144 The studies selected for this review study used a variety of methodological techniques. All three phases of  
145 the ROBIS tool were utilized to assess the risk of bias in our review study's methodology. Except for a few  
146 points in Domain 2 of Phase 2, all other requirements were met. As a result, the total risk of bias was de-  
147 termined to be minimal.

148

#### 149 **Table 2. Characteristics of Three publications focusing on older and recent methods of medical man-** 150 **agement of Quadrangular Space Syndrome**

151 QS: Quadrangular space; QSS: Quadrangular space syndrome

152

#### 153 **Table 3. Characteristics of twelve publications focusing on methods/techniques of Surgical** 154 **management of Quadrangular Space Syndrome**

155 QS: Quadrangular space; QSS: Quadrangular space syndrome; AXN: Axillary nerve; PHCA: Posterior Circumflex Humeral Artery

156

157

158

159

160

161

| Sr. no. | Title of the article                                                                   | Authors and Publication Year & Country of publication | Study design | Number of participants & Gender | Participants age group | Ethnicity of participants | Observations/Recommendations                                                                                                                                                                                                                                                                                                                                                                                                      |
|---------|----------------------------------------------------------------------------------------|-------------------------------------------------------|--------------|---------------------------------|------------------------|---------------------------|-----------------------------------------------------------------------------------------------------------------------------------------------------------------------------------------------------------------------------------------------------------------------------------------------------------------------------------------------------------------------------------------------------------------------------------|
| 1       | Quadrilateral space syndrome: a case study and review of the literature.               | Hoskins WT, et al., 2005 [14]; Australia              | Case study   | One participant                 | 50 years               | White population          | Conservative management of QSS with ice and physiotherapy, involving transverse friction massage and active release                                                                                                                                                                                                                                                                                                               |
| 1       | Quadrilateral space syndrome: a case report                                            | Brown SA, 2015 [15]; Canada                           | Case report  | 9 participants (male)           | 20-45 years            | American Indian           | soft tissue massage techniques to the QS.<br>It also involves mobilization of the humerus into internal rotation, shoulder mobilizations directed at a tight posterior capsule.<br>It prevents unnecessary surgery and allow effective treatment to return the patient to full activities.                                                                                                                                        |
| 2       | Spontaneous resolution of quadrilateral space syndrome: a case report                  | Gregory T, et al., 2015 [15]; Canada                  | Case report  | -                               | -                      | American Indian           | This case highlighted an unusual resolution to QSS, with true neurovascular impingement, due to a paralabral cyst. Spontaneous resolution of symptoms was seen with time and nonsteroidal anti-inflammatory medication. Nonsurgical treatment includes symptomatic care, physical therapy, and reassurance.                                                                                                                       |
| 3       | Conservative treatment after axillary nerve re-injury in a rugby player: a case report | Frizziero A, et al., 2019 [16]; Italy                 | Case report  | One participant (male)          | 27 years               | White population          | Conservative treatment consists of a 2-phases rehabilitation protocol being built up based on a shoulder kinematic test, electrostimulation test and a further Electromyography.<br>Premature return to sport may predispose the patient to the risk of re-injury.<br>The prompt diagnosis and a timely specific rehabilitation protocol allows to a safe full return to professional sport activity and may prevent recurrences. |

|   |                                                                                               |                                                |             |                          |             |                    |                                                                                                                                                                                                                                                                                                                                                                                                        |
|---|-----------------------------------------------------------------------------------------------|------------------------------------------------|-------------|--------------------------|-------------|--------------------|--------------------------------------------------------------------------------------------------------------------------------------------------------------------------------------------------------------------------------------------------------------------------------------------------------------------------------------------------------------------------------------------------------|
|   | syndrome: the Mayo Clinic experience with a new classification system and case series         | 2015 [17]; Arizona (USA)                       | series      | (4 females, 3 males)     |             | Indian             | vascular QSS to prevent distal embolization, along with thrombolysis for acute thrombotic embolization. Surgical neurolysis and QS decompression are used to definitively treat neurogenic QSS.                                                                                                                                                                                                        |
| 2 | Quadrilateral space syndrome                                                                  | Cahill BR, et al., 1983 [18]; USA              | Review      | 18 cases                 | 25-35 years | American<br>Indian | Surgical decompression of the QS should be considered if the patient has sufficient symptoms with no relief after a long course of conservative care or an arteriogram indicating occlusion of the PHCA and local tenderness posteriorly over the QS.                                                                                                                                                  |
| 3 | Musculoskeletal ultrasound diagnosis of quadrilateral space syndrome: A case report. Medicine | Zhang J, et al., 2021 [19]; Baltimore (USA)    | Case report | One participant (female) | -           | American<br>Indian | A lidocaine block test (which includes injecting 5 mL of lidocaine (1%) into quadrangular space) under the guidance of musculoskeletal ultrasound, improved the symptoms of QSS.<br><br>Three months later, reexamination using musculoskeletal ultrasound showed that the cross-sectional area of AXN, ratio of longitudinal and transverse diameter, and blood flow velocity of PHCA became normal.  |
| 4 | Quadrilateral space syndrome: diagnosis and operative decompression technique.                | Francel TJ, et al., 1991 [20]; Baltimore (USA) | Case series | 4 participants           | 31-50 years | American<br>Indian | Proposed a Posterior surgical approach which uses a cosmetically adequate incision and avoids division of the deltoid muscle.<br><br>The technique minimizes postoperative bleeding and facilitates rehabilitation.                                                                                                                                                                                    |
| 5 | Ultrasound-Guided Diagnosis and Management for Quadrilateral Space Syndrome                   | Feng SH, et al., 2017 [21]; Taiwan             | Case report | One participant (female) | 54 years    | Asian              | Ultrasonography confers several advantages for imaging and performing interventions for QSS, especially for patients not responding to conservative treatments.<br><br>US-guided perineural steroid injections or pulsed radiofrequency neuromodulation of the axillary nerve can be considered in patients in whom a diagnosis of QSS is established based on temporary pain relief following a diag- |

|    |                                                                                                           |                                           |                 |                            |             |                  |                                                                                                                                                                                                                                                                                                                                                                                                                                      |
|----|-----------------------------------------------------------------------------------------------------------|-------------------------------------------|-----------------|----------------------------|-------------|------------------|--------------------------------------------------------------------------------------------------------------------------------------------------------------------------------------------------------------------------------------------------------------------------------------------------------------------------------------------------------------------------------------------------------------------------------------|
|    |                                                                                                           |                                           |                 |                            |             |                  | nostic US-guided block with local anesthetics.                                                                                                                                                                                                                                                                                                                                                                                       |
| 6  | Feasibility of arthroscopic decompression of the axillary nerve in the quadrilateral space: Cadaver study | Borrel F, et al., 2021 [22]; France       | Cadaveric study | 6 cadavers                 | -           | White population | Arthroscopic axillary nerve decompression can be proposed to patients with axillary nerve compression not responding to conservative treatment or as the first-line treatment in patients with compressive lesions or with isolated teres minor atrophy visible on MRI.                                                                                                                                                              |
| 7  | Surgical decompression of the quadrilateral space in overhead athletes                                    | McAdams TR, et al., 2008 [23]; California | Case series     | Four participants (female) | 17-34 years | American Indian  | Surgical decompression of the QS can provide predictable pain relief and return to overhead sports.                                                                                                                                                                                                                                                                                                                                  |
| 8  | Axillary nerve injury: diagnosis and treatment                                                            | Steinmann SP, et al., 2001 [24]; USA      | Review          | -                          | -           | American Indian  | Most patients with an axillary nerve injury have an excellent response to nonoperative treatment. Favorable results can be expected for the rest if surgical repair is undertaken within 6 months of injury. Surgical options include neurolysis, nerve grafting, and neurotization.                                                                                                                                                 |
| 9  | Diagnosis and management of vascular injuries in the shoulder girdle of the overhead athlete              | Reeser JC. 2007 [25]; USA                 | Review          | -                          | -           | American Indian  | Treatment options include physical therapy and (in the case of thrombus) thrombolysis, but surgical decompression of the neurovascular bundle is generally advocated.                                                                                                                                                                                                                                                                |
| 10 | Axillary nerve injuries in contact sports: recommendations for treatment and rehabilitation               | Perlmutter GS, et al, 1998 [26]; USA      | Book chapter    | -                          | -           | American Indian  | Treatment should emphasize the maintenance of a passive and active range of motion as well as strengthening of the rotator cuff, deltoid, and periscapular musculature. Athletes who sustain axillary nerve injuries may return to contact sport participation when they have achieved full shoulder active range of motion and when shoulder strength is documented to be good to excellent by isokinetic or manual muscle testing. |
| 11 | Deltopectoral approach                                                                                    | Andermahr J. et al., 2015 [27]; Canada    | Chapter         | -                          | -           | American Indian  | Described the (Anterior) deltopectoral approach which is regularly used for surgical management of several shoul-                                                                                                                                                                                                                                                                                                                    |



|    |                                                                                                                                       |                                    |                  |                    |   |                  |                                                                                                                                                                               |
|----|---------------------------------------------------------------------------------------------------------------------------------------|------------------------------------|------------------|--------------------|---|------------------|-------------------------------------------------------------------------------------------------------------------------------------------------------------------------------|
|    |                                                                                                                                       |                                    |                  |                    |   |                  | der fractures.                                                                                                                                                                |
| 12 | Ultrasound-guided anterior approach to the axillary and intercostobrachial nerves in the axillary fossa: an anatomical investigation. | Feigl G et al., 2018 [28]; Austria | Ca-daveric study | Forty-six cadavers | - | White population | Conducted a cadaveric study to confirm a reliable ultrasonographic technique to visualize the AXN and ICBN anteriorly from the usual axillary brachial plexus block approach. |

165

166

**3.4 Commonly used surgical approaches for surgical decompression in QSS are as follows:**

167

**a. Anterior (Delto-pectoral) approach:**

168

For shoulder arthroplasty, the anterior approach is currently the preferred technique. The patient is positioned in a supine position with the right arm in 90-degree abduction in this method. A 12 cm long incision running from the lateral margin of the coracoid process to the proximal humeral shaft near to the deltoid tuberosity is to be taken on the right side, using bony and surface landmarks (acromion, clavicle, coracoid process, deltoid) [27]. Within the Delto-pectoral groove, the clavipectoral membrane is incised. The subscapularis muscle is exposed after retracting the deltoid muscle laterally and the conjoint tendon medially. The AXN can be found on the surface of the subscapularis muscle and close to its lower border. Because it is directly associated to the teres minor belly inferiorly, the lower border of the subscapularis muscle is the most critical region.

169

170

171

172

173

174

175

176

177

The lower border of the teres minor is detected, and quadrangular space is traced by inserting a fingertip horizontally forwards along the plane of the lower border of the teres minor, using rough dissection. The contents of the QS can be dissected using blunt dissection after the QS has been identified. The teres major muscle does not need to be exposed, and the contents of the QS (AXN and PHCA) can be recognized and traced within the QS via blunt dissection. Any fibrous strands or adhesions in the QS and its contents can be removed. This method spares no muscle [27].

178

179

180

181

182

183

184

**b. Posterior/Scapular approach:**

185

The patient is put in a lateral decubitus position and a longitudinal incision of approximately 4 cm is made over the posterior shoulder in this surgical approach. The underlying fat within the QS between the teres and the teres major is shown by securing the posterior border of the deltoid and reflecting it supero-laterally. Following that, the AXN and posterior circumflex humeral vessels will be palpated as they exit the QS, and the QS will be located and secured [20].

186

187

188

189

190

**Table 4: Comparison of both the approaches based on the studied parameters [29]**

| Sr. No | Parameters based on which the Approach is tested | Anterior/<br>Delto-pectoral approach<br>(Score:10) | Posterior<br>approach<br>(Score:10) |
|--------|--------------------------------------------------|----------------------------------------------------|-------------------------------------|
|--------|--------------------------------------------------|----------------------------------------------------|-------------------------------------|

|   |                                                                   |                   |                    |
|---|-------------------------------------------------------------------|-------------------|--------------------|
| 1 | Anatomical ease of performing the procedure                       | 06 (+++)          | 08 (++++)          |
| 2 | Requirement to incise any structure like muscle, vessels, etc.    | Nil               | Yes                |
| 3 | Anatomical ease in identifying involved neuro-vascular structures | 06 (+++)          | 08 (++++)          |
| 4 | Time duration required to complete the procedure                  | More than 15 min. | Less than 10 min.  |
| 5 | Technical expertise required to execute the procedure             | high++++)         | Less (++)          |
| 6 | Probability of injury to neuro-vascular structures                | 06 (+++)          | 08 (++++)          |
| 7 | Probability of postoperative fibrosis and other complications     | Minimal (+)       | Significant (++++) |

191

192

**Table 5: The grading system determined for every parameter studied is as follows [29]**

| Sl. No | Name of the Parameter Studied/Observed                            | The grades were given as a score of 10              |          |               |                                                                       |                             |
|--------|-------------------------------------------------------------------|-----------------------------------------------------|----------|---------------|-----------------------------------------------------------------------|-----------------------------|
|        |                                                                   | 2 points                                            | 4 points | 6 points      | 8 points                                                              | 10 points                   |
| 1      | Anatomical ease of performing the procedure                       | Significantly Easy +                                | Easy ++  | Average +++   | Difficult ++++                                                        | Significant Difficult +++++ |
| 2      | Requirement to incise any structure like muscle, vessels, etc.,   | No requirement to incise any structure at all (Nil) |          |               | Requirement to incise either 1 or more neurovascular structures (Yes) |                             |
| 3      | Anatomical ease in identifying involved neuro-vascular structures | Very Easy +                                         | Easy ++  | Average +++   | Difficult ++++                                                        | Very Difficult +++++        |
| 4      | Time duration required to complete the procedure                  | Less than 10 minutes                                |          | 10-15 minutes | More than 15 minutes                                                  |                             |
| 5      | Technical expertise required to execute the procedure             | Minimal +                                           | Less ++  | Average +++   | High ++++                                                             | Significant +++++           |
| 6      | Probability of injury to neuro-vascular structures                | Minimal+                                            | Less ++  | Average +++   | High ++++                                                             | Significant +++++           |
| 7      | Probability of postoperative fibrosis and other complications     | Minimal +                                           | Less ++  | Average +++   | High ++++                                                             | Significant +++++           |

193

194

195

196

#### 4. Discussion

197

198

199

200

201

In their work, Cahill BR and Palmer RE (1983) advocated a posterior technique in which a transverse incision was made parallel to the scapula's spine and curved inferiorly over the rear portion of the humerus. The deltoid was later severed from the scapula's spine. When Teres minor was inserted into the rotator cuff, it became separated and reflected medially. Blunt and sharp dissection were used to decompress quadrangular space. This method produced satisfactory results in 16 of 18 patients [18].

202  
203  
204  
205  
206  
207  
208  
209  
210  
211  
212  
213  
214  
215  
216  
217  
218  
219  
220  
221  
222  
223  
224  
225  
226  
227  
228  
229  
230  
231  
232  
233  
234  
235  
236  
237  
238

**Pitfalls of this technique:**

- i. Removal of Deltoid and Teres Minor resulted in excess bleeding intra-operatively [18].
- ii. Division of teres minor weakened the rotator cuff and the lateral arm rotation [18].
- iii. The postoperative wide scar may itself compress the neurovascular bundle [18].
- iv. Postoperative chronic pain and formation of poor quality tissue [18, 20]

**Francel TJ et al. (1991)** in their study used a vertical or S-shaped incision which was made on the region of highest tenderness, i.e., quadrangular space, and skin flaps were elevated to expose the inferior border of the deltoid, according to their study [20]. After incising the deltoid fascia and exposing the teres muscle bellies, the deltoid was retracted superiorly. The quadrilateral space was reached once the fascia between the teres muscle bellies was opened. This procedure did not separate the Deltoid and Teres Minor muscles. The AXN and PHCA were isolated and identified. The motor response of the teres minor and deltoid muscles was validated after nerve stimulation. Finger insertion divides fibrous bands and decompresses space [20].

**Advantages of this technique:**

- i. Intact Deltoid and Teres Minor reduced bleeding and quick postoperative shoulder movement is possible [20].
- ii. Fibrous atrophy of the deltoid was prevented [20].
- iii. The postoperative scar was smaller [20].

In their study, **Andermahr J. et al. (2015)** emphasised the (anterior) deltopectoral technique, which was commonly employed for practically any shoulder fracture treatment and was frequently recommended, especially in anterior glenoid fractures [27]. This method, with a few tweaks, could be used to decompress the QSS surgically.

The (Anterior) Delto-pectoral technique was also employed by **Feigl G et al. (2018)** to view the AXN anteriorly. AXN was found near the inferolateral boundary of the subscapular muscle to enter the QS in 91 out of 92 limbs in their cadaveric investigation. The roof of the area is defined in this manner by the insertion of the subscapular muscle at the lesser tubercle [28].

**Limitations**

A review of such items was impossible due to a lack of free access to whole text for various publications. Even abstracts were absent in a few papers. This constraint will be addressed in future review papers.

**5. Conclusions**

239 We conclude that the anterior approach is technically easier to perform and can be employed for surgical  
240 decompression in QSS based on our findings from our literature research. Furthermore, an  
241 ultrasound-guided anaesthetic block to AXN can be simply integrated with this method. The authors  
242 propose that cadaveric studies be used to give anatomists and surgeons more opportunities to perform  
243 and evaluate older and newer surgical techniques.  
244

245 **Author Contributions:** The contributions from the authors of this research study are as follows: “Conceptualization,  
246 SC, SK, SM.; methodology, SC.; software, not applicable; validation, SC., SS. and SP; formal analysis, SC; investiga-  
247 tion, SC; resources, SC, SK and SP.; data curation, SC and SP.; writing—original draft preparation, SC, SP, RJ, PA.;  
248 writing—review and editing, SC and SS.; visualization, SS.; supervision, SM.; project administration, SC, SK and SS.;  
249 funding acquisition, not applicable. All authors have read and agreed to the published version of the manuscript.”

250

251 **Funding:** This research study received no external funding.  
252

253

254 **Institutional Review Board Statement:** Since this was a systematic review which did not involve humans or animals,  
255 no ethical approval was required, and the AIIMS Rajkot Institutional Ethical Committee was not consulted. However,  
the AIIMS Rajkot Research Review Board was notified about this research work, along with the author information.

256

257 **Informed Consent Statement:** Not applicable, as the study did not involve humans.  
258

259

260 **Data Availability Statement:** Not applicable.

261

262 **Acknowledgments:** the authors wish to thank the faculties Dr. Pradip Chauhan, Assistant Professor, AIIMS Rajkot for  
his constant support whenever required in this review study.

263

**Conflicts of Interest:** The authors declare no conflict of interest.

## 264 References

265

- 266 1. Miller RH, Azar FM, Throckmorton TW. Campbell’s Operative Orthopedics. Twelfth edition. Volume 3. Par  
267 Sports Medicine. Chapter 46. Shoulder and Elbow injuries. Page: 2238.  
268 <https://www.medicalbook.co.in/medical-book-orthopedics.html>.
- 269 2. Van de PD, Kuijer PP, Langenhorst T, Maas M. High prevalence of self-reported symptoms of digital ischemia in  
270 elite male volleyball players in the Netherlands: a cross-sectional national survey. *Am J Sports Med.*  
271 2012;40(10):2296-302. <https://doi.org/10.1177/0363546512456973>.
- 272 3. Cormier PJ, Matalon TA, Wolin PM. Quadrilateral space syndrome: a rare cause of shoulder pain. *Radiology.*  
273 1988;167(3):797-98. <https://doi.org/10.1148/radiology.167.3.3363143>.
- 274 4. McClelland D, Hoy G. A case of quadrilateral space syndrome with involvement of the long head of the triceps.  
275 *Am J Sports Med.* 2008;36(8):1615-17. <https://doi.org/10.1177/0363546508321476>.
- 276 5. Reutter D, Hunziker R, Husmann M. Computed angiogram of the upper extremities for diagnosing a rare cause  
277 of brachial arterial embolism: the “Pitcher Syndrome”. *Eur Heart J.* 2010;31(22):2782.  
278 <https://doi.org/10.1093/eurheartj/ehq269>.
- 279 6. Chautems RC, Glauser T, Waeber-Fey MC, Rostan O, Barraud GE. Quadrilateral space syndrome: case report and  
280 review of the literature. *Ann Vasc Surg.* 2000;14(6):673-76. <https://doi.org/10.1007/s100169910120>.
- 281 7. Snell Richard S. *Clinical Anatomy by Regions*. 9th edition. Chapter 9. The Upper Limb. Quadrangular space. 359.  
282 <https://www.yumpu.com/en/document/view/55653009/snells-clinical-anatomy-by-regions-9th-edition>.
- 283 8. Manske RC, Sumler A, Runge J. Quadrilateral space syndrome. *Hum Kinet.* 2009;14:45-47.  
284 <https://dx.doi.org/10.1123%2Fatt.14.2.45>.
- 285 9. Rea P. Essential clinically applied anatomy of the peripheral nervous system in the head and neck. *Science Direct*  
286 *Neck.* 3.15.1 Axillary Nerve. 2016.

- 287 <https://www.elsevier.com/books/essential-clinically-applied-anatomy-of-the-peripheral-nervous-system-in-the-head-and-neck/rea/978-0-12-803633-4>.
- 288
- 289 10. Juneja P, Hubbard JB. StatPearls [Internet]. StatPearls Publishing; Treasure Island (FL): Aug 22, 2020. Anatomy, Shoulder and Upper Limb, Arm Teres Minor Muscle. <https://www.ncbi.nlm.nih.gov/books/NBK513324/>.
- 290
- 291 11. Elzanie A, Varacallo M. StatPearls [Internet]. StatPearls Publishing; Treasure Island (FL): Aug 22, 2020. Anatomy, Shoulder and Upper Limb, Deltoid Muscle. <https://www.ncbi.nlm.nih.gov/books/NBK537056/>
- 292
- 293 12. Whiting P, Savovic J, Higgins JP, et al. ROBIS: A new tool to assess risk of bias in systematic reviews was developed. *J Clin Epidemiol*. 2016;69:225-234. doi:10.1016/j.jclinepi.2015.06.005.
- 294
- 295 13. Dalagiannis N, Tranovich M, Ebraheim N. Teres minor and quadrilateral space syndrome: A review. *J Orthop*. 2020 Jan 21;20:144-146. doi: 10.1016/j.jor.2020.01.021.
- 296
- 297 14. Hoskins WT, Pollard HP, McDonald AJ. Quadrilateral space syndrome: a case study and review of the literature. *Br J Sports Med*. 2005 Feb;39(2):e9. doi: 10.1136/bjsm.2004.013367.
- 298
- 299 15. Gregory T, Sangha H, Bleakney R. Spontaneous resolution of quadrilateral space syndrome: a case report. *Am J Phys Med Rehabil*. 2015 Jan;94(1):e1-5. doi: 10.1097/PHM.0000000000000237.
- 300
- 301 16. Frizziero A, Vittadini F, Del Felice A, Creta D, Ferlito E, Gasparotti R, Masiero S. Conservative treatment after axillary nerve re-injury in a rugby player: a case report. *Eur J Phys Rehabil Med*. 2019 Aug;55(4):510-514. doi: 10.23736/S1973-9087.18.05165-1. Epub 2018 Dec 21.
- 302
- 303
- 304 17. Brown SA, Doolittle DA, Bohanon CJ, Jayaraj A, Naidu SG, Huettl EA, Renfree KJ, Oderich GS, Bjarnason H, Glociczki P, Wysokinski WE, McPhail IR. Quadrilateral space syndrome: the Mayo Clinic experience with a new classification system and case series. *Mayo Clin Proc*. 2015 Mar;90(3):382-94. doi: 10.1016/j.mayocp.2014.12.012. Epub 2015 Jan 31.
- 305
- 306
- 307
- 308 18. Cahill BR, Palmer RE. Quadrangular space syndrome. *J Hand Surg Am*. 1983;8(1):65-69. [https://doi.org/10.1016/s0363-5023\(83\)80056-2](https://doi.org/10.1016/s0363-5023(83)80056-2).
- 309
- 310 19. Zhang J, Zhang T, Wang R, Wang T. Musculoskeletal ultrasound diagnosis of quadrilateral space syndrome: A case report. *Medicine (Baltimore)*. 2021;100(10):e24976. doi:10.1097/MD.00000000000024976
- 311
- 312 20. Francel, Thomas J. M.D.; Dellon, A Lee M.D.; Campbell, James N. M.D. Quadrilateral Space Syndrome: Diagnosis and Operative Decompression Technique, *Plastic and Reconstructive Surgery*: May 1991 - Volume 87 - Issue 5 - p 911-916. <https://doi.org/10.1097/00006534-199105000-00016>.
- 313
- 314
- 315 21. Feng SH, Hsiao MY, Wu CH, Özçakar L. Ultrasound-Guided Diagnosis and Management for Quadrilateral Space Syndrome. *Pain Med*. 2017 Jan 1;18(1):184-186. doi: 10.1093/pm/pnw256.
- 316
- 317 22. Borrel F, Desmoineaux P, Delcourt T, Pujol N. Feasibility of arthroscopic decompression of the axillary nerve in the quadrilateral space: Cadaver study. *Orthop Traumatol Surg Res*. 2021 Feb;107(1):102762. doi: 10.1016/j.otsr.2020.102762. Epub 2020 Dec 14.
- 318
- 319
- 320 23. McAdams TR, Dillingham MF. Surgical decompression of the quadrilateral space in overhead athletes. *Am J Sports Med*. 2008 Mar;36(3):528-32. doi: 10.1177/0363546507309675. Epub 2007 Nov 30.
- 321
- 322 24. Steinmann SP, Moran EA. Axillary nerve injury: diagnosis and treatment. *J Am Acad Orthop Surg*. 2001 Sep-Oct;9(5):328-35. doi: 10.5435/00124635-200109000-00006.
- 323
- 324 25. Reeser JC. Diagnosis and management of vascular injuries in the shoulder girdle of the overhead athlete. *Curr Sports Med Rep*. 2007 Oct;6(5):322-7. PMID: 17883968
- 325
- 326 26. Perlmutter GS, Apruzzese W. Axillary nerve injuries in contact sports: recommendations for treatment and rehabilitation. *Sports Med*. 1998 Nov;26(5):351-61. doi: 10.2165/00007256-199826050-00005.
- 327
- 328 27. Andermah Jr, McKee M, Nam D. *AO Surgery Reference*. First edition. 2015. Deltopectoral approach. <https://surgeryreference.aofoundation.org/orthopaedic-trauma/adult-trauma/clavicle/additional-credits>. <https://surgeryreference.aofoundation.org/orthopaedic-trauma/adult-trauma/scapula/approach/deltopectoral-approach>.
- 329
- 330
- 331
- 332 28. Feigl G, Aichner E, Mattersberger C, Zahn PK, Avila Gonzalez C, Litz R. Ultrasound-guided anterior approach to the axillary and intercostobrachial nerves in the axillary fossa: an anatomical investigation. *Br J Anaesth*. 2018;121(4):883-89. <https://doi.org/10.1016/j.bja.2018.06.006>.
- 333
- 334 29. Charmode S, Mehra S, Kushwaha S. Revisiting the Surgical Approaches to Decompression in Quadrilateral Space Syndrome: A Cadaveric Study. *Cureus*. 2022 Feb 26;14(2):e22619. doi: 10.7759/cureus.22619.
- 335
- 336

1 **Figure 1. Boundaries of Quadrangular space with its contents**  
 2 (This image has been created and edited by Dr. Shalom Philip, Senior resident, AIIMS Rajkot)

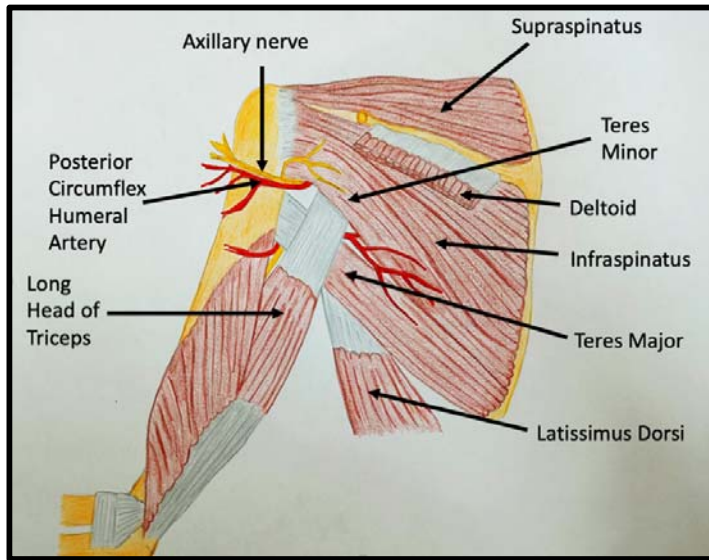

13  
 14  
 15 **Figure 2. PRISMA flow chart of systematic literature search performed for publications focusing on methods of medical and**  
 16 **surgical**  
 17 **managemnt of Quadrangular Space Syndrome**

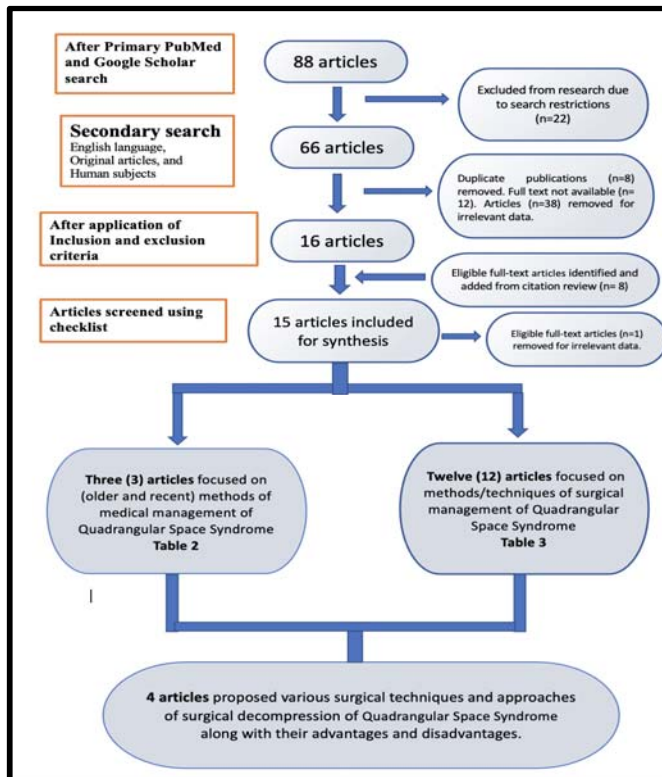

Source: https://medrxiv.org/content/10.1101/2022.05.21.22275366v1.full.pdf
